# Supplementary material for: Full compositional control of PbSxSe1−x thin films by the use of acylchalcogourato lead(ii) complexes as precursors for AACVD
Source: Royal Society of Chemistry journal article supplement (doi:10.1039/c8dt03443e), 2018-01-01
Supplement: c8dt03443e1.pdf [file c8dt03443e1.pdf]

## Full compositional control of $\text{PbS}_x\text{Se}_{1-x}$ thin films by use of acylchalcogourato lead(II) complexes as precursors for AACVD

Emmanuel Ezenwa,<sup>a</sup> Paul D. McNaughten,<sup>a\*</sup> James Raftery,<sup>a</sup> David J. Lewis<sup>a</sup> and Paul O'Brien<sup>a,b\*</sup>

### Supporting Information

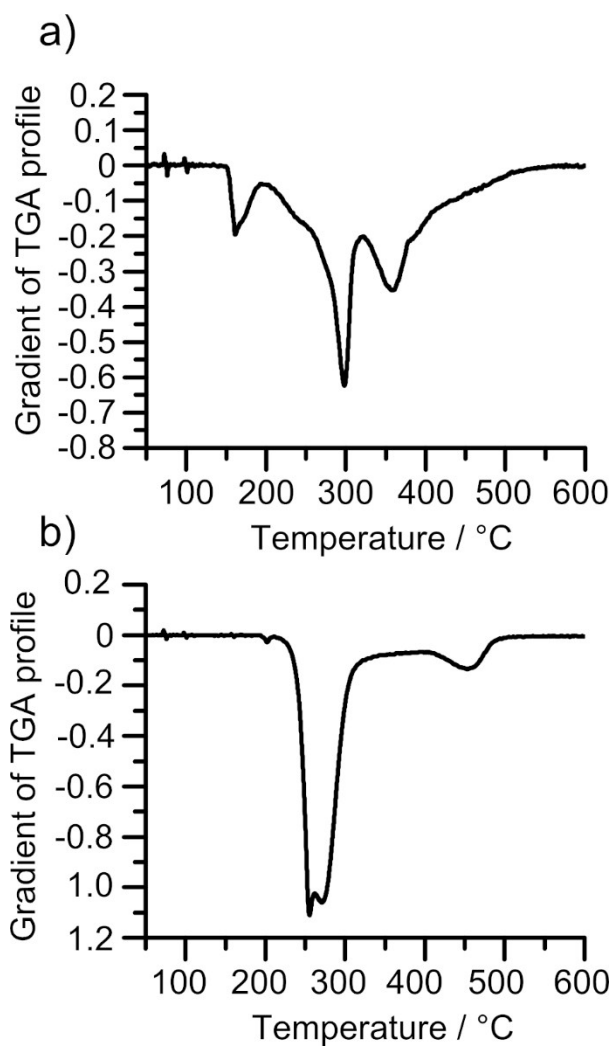

**SI Figure 1:** The first derivative of the TGA profiles for a) (4) and b) (3).

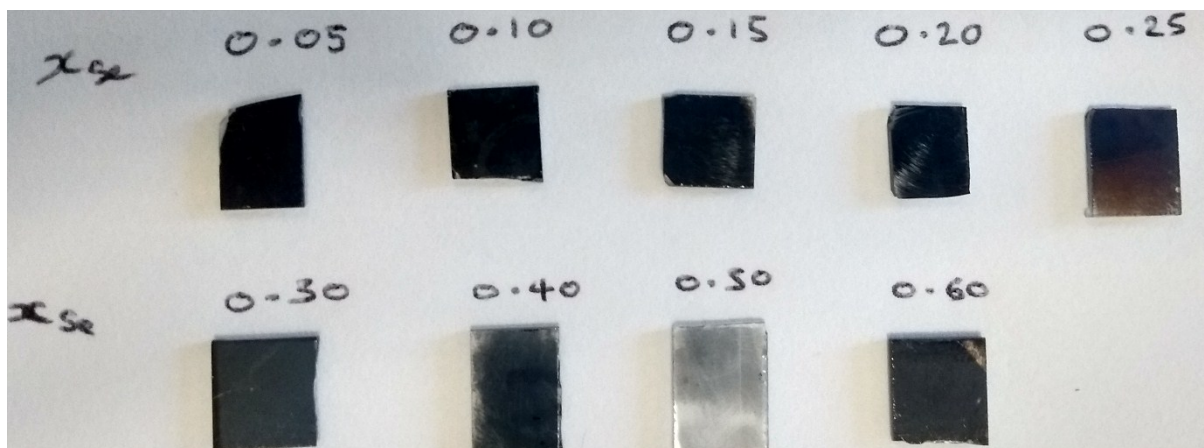

SI Figure 2: Photographs of the films with mole fractions between 0.05 and 0.6 of the selenium precursor.
